# Supplementary material
Source: PubMed Central journal article supplement (PMC55857)
Supplement: nar_29_16_3362__1.pdf [file nar_29_16_3362__1.pdf]

## SUPPLEMENTARY MATERIAL

Table S1. High resolution B-DNA structures

| <i>NDB ID</i> | <i>PDB ID</i> | <i>No. Base-Pairs</i> | <i>R-Value (obs)</i> | <i>Resolution</i> |
|---------------|---------------|-----------------------|----------------------|-------------------|
| GDL033        | 109D          | 12                    | 19.7                 | 2.0               |
| BDJB50        | 123D          | 10                    | 19.1                 | 1.7               |
| BDJ051        | 126D          | 10                    | 19.6                 | 2.0               |
| GDL022        | 127D          | 12                    | 17.2                 | 2.0               |
| BDJ052        | 158D          | 10                    | 17.9                 | 1.9               |
| GDHB25        | 159D          | 8                     | 15.0                 | 1.8               |
| BDJ060        | 196D          | 10                    | 20.0                 | 1.7               |
| BDJ017        | 1BD1          | 10                    | 16.0                 | 1.6               |
| BDL001        | 1BNA          | 12                    | 17.8                 | 1.9               |
| BDJ025        | 1D23          | 10                    | 16.1                 | 1.5               |
| BDLB26        | 1D27          | 12                    | 18.5                 | 2.0               |
| GDL010        | 1D43          | 12                    | 15.7                 | 2.0               |
| GDL011        | 1D44          | 12                    | 15.7                 | 2.0               |
| GDL012        | 1D45          | 12                    | 15.2                 | 1.9               |
| GDL013        | 1D46          | 12                    | 14.9                 | 2.0               |
| BDJ031        | 1D49          | 10                    | 15.7                 | 1.5               |
| BDJ036        | 1D56          | 10                    | 17.8                 | 1.7               |
| BDJ037        | 1D57          | 10                    | 16.5                 | 2.0               |
| BDJB44        | 1D61          | 10                    | 15.2                 | 1.3               |
| GDL016        | 1D63          | 12                    | 18.3                 | 2.0               |
| BDJB48        | 1DA3          | 10                    | 17.2                 | 2.0               |
| BDF068        | 251D          | 6                     | 18.6                 | 1.9               |
| GDLB41        | 267D          | 12                    | 15.6                 | 2.0               |
| BDJB27        | 2D25          | 10                    | 17.4                 | 1.75              |
| GDLB49        | 304D          | 8                     | 18.4                 | 1.9               |
| GDLB51        | 306D          | 8                     | 15.3                 | 1.6               |
| GDJ054        | 334D          | 10                    | 20.0                 | 1.8               |
| BDL084        | 355D          | 12                    | 19.7                 | 1.4               |
| BDJ008        | 3DNB          | 10                    | 16.4                 | 1.3               |
| BD0007        | 436D          | 12                    | 16.2                 | 1.1               |
| BDLB13        | 4DNB          | 12                    | 16.9                 | 2.0               |
| BDJ019        | 5DNB          | 10                    | 16.0                 | 1.4               |
| BDL005        | 7BNA          | 12                    | 14.9                 | 1.9               |
| BDL020        | 9BNA          | 12                    | 18.8                 | 1.9               |
| BDJ061        | N/A           | 10                    | 17.0                 | 1.95              |

**Table S2.** High resolution A-DNA structures

| <i>NDB ID</i> | <i>PDB ID</i> | <i>No. Base-Pairs</i> | <i>R-value(obs)</i> | <i>Resolution</i> |
|---------------|---------------|-----------------------|---------------------|-------------------|
| ADDB01        | 1ANA          | 4                     | 16.5                | 2.0               |
| ADFB62        | 254D          | 6                     | 19.7                | 1.9               |
| ADFB63        | 275D          | 6                     | 17.2                | 2.0               |
| ADH008        | 9DNA          | 8                     | 17.1                | 1.8               |
| ADH010        | 0AN8          | 8                     | 19.8                | 1.8               |
| ADH0102       | 368D          | 8                     | 16.9                | 1.6               |
| ADH0103       | 369D          | 8                     | 17.2                | 1.9               |
| ADH0104       | 370D          | 8                     | 18.1                | 1.67              |
| ADH0105       | 371D          | 8                     | 19.0                | 1.9               |
| ADH014        | 1DNS          | 8                     | 11.5                | 2.0               |
| ADH026        | 2D94          | 8                     | 16.2                | 1.7               |
| ADH029        | n.a.          | 8                     | 16.0                | 1.9               |
| ADH033        | 295D          | 8                     | 17.7                | 1.5               |
| ADH034        | n.a.          | 8                     | 12.7                | 2.0               |
| ADH038        | 1D78          | 8                     | 19.8                | 1.4               |
| ADH039        | 1D79          | 8                     | 19.1                | 1.45              |
| ADH047        | 118D          | 8                     | 15.4                | 1.64              |
| ADH070        | 243D          | 8                     | 17.7                | 1.9               |
| ADH078        | 317D          | 8                     | 16.4                | 1.9               |
| ADHB11        | 115D          | 8                     | 14.0                | 1.7               |
| ADHB17        | 1D90          | 8                     | 14.0                | 1.7               |
| ADHB95        | 341D          | 8                     | 18.5                | 1.75              |
| ADHB99        | 344D          | 8                     | 11.15               | 1.46              |
| ADJ0102       | 348D          | 10                    | 19.0                | 1.7               |
| ADJ0103       | 349D          | 10                    | 19.9                | 1.9               |
| ADJ0112       | 395D          | 10                    | 19.5                | 1.9               |
| ADJ0113       | 396D          | 10                    | 18.9                | 1.8               |
| ADJ022        | 1D13          | 10                    | 18.0                | 2.0               |
| ADJ049        | 160D          | 10                    | 18.5                | 1.65              |
| ADJ050        | 137D          | 10                    | 18.5                | 1.7               |
| ADJ051        | 138D          | 10                    | 18.3                | 1.8               |
| ADJ065        | 212D          | 10                    | 19.4                | 1.9               |
| ADJ067        | 221D          | 10                    | 20.0                | 1.9               |
| ADJ075        | 260D          | 10                    | 18.6                | 1.9               |
| ADJB110       | 383D          | 10                    | 19.6                | 1.7               |
| ADJB61        | 213D          | 10                    | 16.3                | 1.6               |
| ADJB79        | 318D          | 10                    | 16.2                | 2.0               |
| ADJB88        | 327D          | 10                    | 19.1                | 1.94              |
| ADL025        | 2D47          | 12                    | 17.7                | 2.0               |
| ADL047        | 399D          | 12                    | 16.5                | 1.9               |
| ADLS105       | 363D          | 12                    | 19.2                | 2.0               |
| AH0002        | 410D          | 10                    | 15.9                | 1.6               |
| AH0003        | 411D          | 10                    | 16.8                | 1.93              |
| AH0004        | 412D          | 10                    | 18.9                | 1.65              |
| UDJ032        | 232D          | 10                    | 13.85               | 1.3               |
| UDJB44        | 238D          | 10                    | 19.6                | 2.0               |

**Table S3.** High resolution Z-DNA structures

| <i>NDB ID</i> | <i>PDB ID</i> | <i>No. Base-Pairs</i> | <i>R-value(obs)</i> | <i>Resolution</i> |
|---------------|---------------|-----------------------|---------------------|-------------------|
| DDF027        | 292D          | 6                     | 16.1                | 1.0               |
| UDF025        | 192D          | 6                     | 18.5                | 1.92              |
| ZD0001        | 400D          | 6                     | 19.6                | 1.65              |
| ZD0002        | 417D          | 6                     | 15.0                | 1.5               |
| ZDB020        | n.a.          | 2                     | 13.6                | 0.85              |
| ZDF001        | 2DCG          | 6                     | 14.0                | 0.9               |
| ZDF002        | 1DCG          | 6                     | 17.5                | 1.0               |
| ZDF013        | n.a.          | 6                     | 19.5                | 1.0               |
| ZDF028        | 1D39          | 6                     | 19.8                | 1.2               |
| ZDF029        | 1D48          | 6                     | 18.5                | 1.0               |
| ZDF035        | 131D          | 6                     | 18.0                | 1.0               |
| ZDF039        | 181D          | 6                     | 19.9                | 1.6               |
| ZDF052        | 293D          | 6                     | 19.1                | 1.0               |
| ZDF053        | 336D          | 6                     | 19.0                | 1.0               |
| ZDF059        | 351D          | 6                     | 19.3                | 1.64              |
| ZDF060        | 362D          | 6                     | 11.7                | 1.3               |
| ZDF061        | 390D          | 6                     | 18.8                | 2.0               |
| ZDFB03        | n.a.          | 6                     | 15.6                | 1.3               |
| ZDFB04        | 1DN4          | 6                     | 13.27               | 1.6               |
| ZDFB05        | 1DN5          | 6                     | 12.47               | 1.4               |
| ZDFB06        | n.a.          | 6                     | 16.0                | 1.2               |
| ZDFB12        | 1DNF          | 6                     | 17.2                | 1.5               |
| ZDFB21        | 1D24          | 6                     | 19.0                | 1.9               |
| ZDFB25        | 1DA2          | 6                     | 18.1                | 1.7               |
| ZDFB31        | 1D76          | 6                     | 13.8                | 1.3               |
| ZDFB36        | 133D          | 6                     | 18.9                | 1.8               |
| ZDFB37        | 145D          | 6                     | 19.3                | 1.25              |
| ZDFB41        | 210D          | 6                     | 17.4                | 1.35              |
| ZDFB42        | 211D          | 6                     | 17.0                | 1.6               |
| ZDFB43        | 223D          | 6                     | 17.9                | 1.7               |
| ZDFB51        | 242D          | 6                     | 17.0                | 1.65              |
| ZDG056        | 314D          | 7                     | 19.1                | 1.9               |
| ZDG057        | 331D          | 7                     | 18.4                | 1.65              |
| ZDJ050        | 279D          | 2                     | 18.6                | 1.9               |

**Table S4.** Dataset of CSD structures

| Fragment <sup>a</sup> | CSD reference codes                                                                                                                                                                                                                                                                                                                                                                                                                                                                                          |
|-----------------------|--------------------------------------------------------------------------------------------------------------------------------------------------------------------------------------------------------------------------------------------------------------------------------------------------------------------------------------------------------------------------------------------------------------------------------------------------------------------------------------------------------------|
| Adenine               | acados adenos01 adenos10 amdoad amoada amoadb amoadc araden10<br>bedlif betwus bifyoe boyduo bubfuz buvpox bzapuc20<br>cezmez chxadi10 cidgur coczid cubrum dadpnh10<br>dhoods01 dhoods10 dohgem dorjoj divveh10<br>fabfuj01 fibgec fikhai fikhai01 gahhig gahhig01<br>hemyih kemyeg keplia keplog kubguy meaden01 nakzuu<br>opadna opadna01 opadnb pakwon thopad10 tugjag tugjek<br>vomfos wajzem wibxek yabgaj                                                                                             |
| Guanine               | budway10 cehtak10 dahmii defxuh gebrio gipbiq guansh10 guopna10<br>guopna11 jafhah reczaa scgmpt10 sdgunp tamxek vuwrek vuymil zuzxat                                                                                                                                                                                                                                                                                                                                                                        |
| Cytosine              | acytid bivvil bofwoi botsim10 boxgie budway10 cimjen<br>cytcyp20 cytidi01 cytidi10 decyuf fikhow fovxet gahhom<br>gahhom01 gigmoy gouger10 jikhoa juhlah kosnov marafc<br>metcyt01 secbux segmas sivzus yukliz                                                                                                                                                                                                                                                                                               |
| Thymine               | cedboc cezfoc clqunb10 dayvoo doxziz duksor duxxez firpol fixgau01<br>fixgau02 fixgau03 gebtem gexxiq gexxiq01 kasvef katyin kexkih<br>kezruc kinheu kinhiy kitsov kogbir kunnem kuthow kuzxei methym01<br>palwuz soddeu sosbil tmthym tpataa trfutm tymcxa vevbut vevbut01<br>vikfea                                                                                                                                                                                                                        |
| Sugars                | fikhai fikhai01 foylua fuxbij gexxiq gexxiq01 gidtes jafhah acurid boxgie<br>cezbis cezfoc cezmez dadpnh10 defpot docypo docypo02 docypo03 docytc<br>doxadm duhhuj dumtou dxcytd etyxur gebtem gergal geyces gidtiw gojwor<br>hmdour ipdxur jappev jibdih jubvil jubvor keclot medour pryurd10 sdgunp<br>sifgap thydin vdurid vexdor                                                                                                                                                                         |
| Phosphate group       | acrcyt adurpo10 aeadmp amatur apapad01 aracyc aurcpb bawjak behlij beprap<br>bixxip bixxip10 brcamp brinsp cattew cexbow cexbux cibbaq cjsix citxim<br>cupyuh cytcyp20 dabsoo dabsuu derdej detlix detlix10 dezmau dinyii fahheb<br>fambok fambok10 firpol gegwyi glphea20 glycac01 gupcyt20 keryah keryah10<br>lerbal mecpsp mgpcpi naamph naamph10 nadens nufluv nutxop palect pallec<br>pextan pflcpa pflcpb pflcpc pflcpc01 reyjek reyjo scgmpt10 suromm tahjiv<br>ticzag wagvab wagvab10 yorpaw yuwilil |

<sup>a</sup>The CSD was searched for crystal structures containing either base, sugar or phosphate fragments.
